# Supplementary material for: Identifying the temporal electrophysiological and molecular changes that contribute to TSC-associated epileptogenesis
Source: PubMed Central journal article supplement (PMC8675202; doi:10.1172/jci.insight.150120), 2021-12-08
Supplement: jciinsight-6-150120-s109.pdf [file jciinsight-6-150120-s109.pdf]

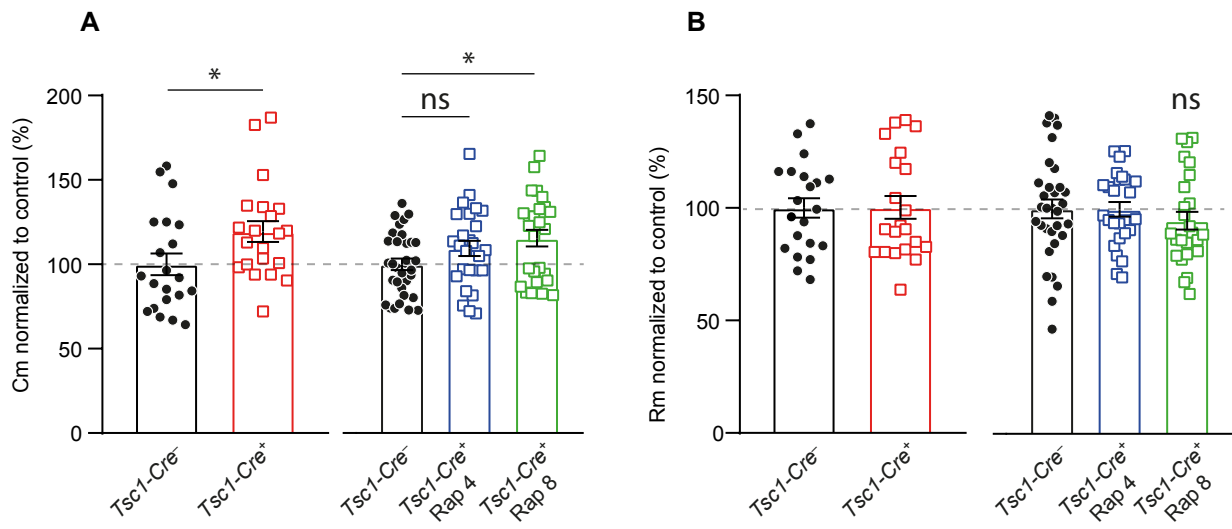

**Supplementary Figure 1. Rescued cell capacitance and unaffected membrane resistance of CA1 pyramidal neurons upon early and late *in vivo* rapamycin treatment.** Normalized (Cm; **A**) and membrane resistance (Rm; **B**) of CA1 pyramidal neurons of *Tsc1-Cre<sup>-</sup>* (black) and *Tsc1-Cre<sup>+</sup>* mice (red) recorded on day 12. Cm and Rm of the rapamycin-treated mice were normalized to their own *Tsc1-Cre<sup>-</sup>* control littermates and all measured on day 12 post gene deletion (*Tsc1-Cre<sup>-</sup>* n = 16, 3 mice; *Tsc1-Cre<sup>+</sup>* n = 15, 3 mice; Unpaired T-test; *Tsc1-Cre<sup>-</sup>* n = 30, 4 mice; vs *Tsc1-Cre<sup>+</sup>*-Rap: n = 26, 4 mice; and *Tsc1-Cre<sup>+</sup>*-Rap 8: n = 26, 4 mice. One-way ANOVA, Dunnett's with *Tsc1-Cre<sup>-</sup>* as control). Error bars indicate SEM. \* P<0.05.

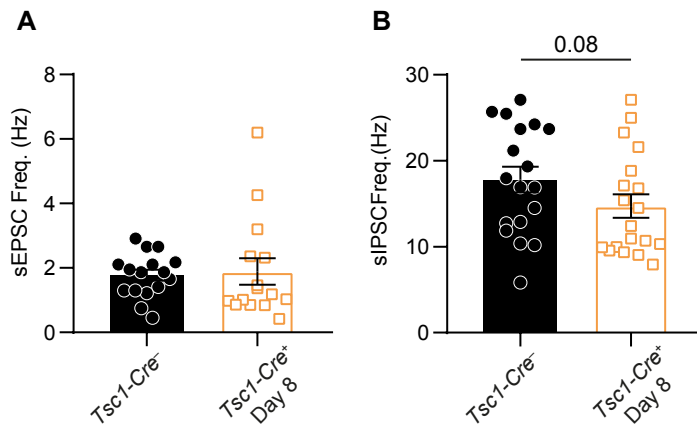

**Supplementary Figure 2. Action potential dependent spontaneous excitatory and inhibitory post synaptic currents on day 8 after gene deletion.** (A) Frequency of spontaneous excitatory post synaptic currents (sEPSC) and (B) spontaneous inhibitory post synaptic currents (sIPSC) measured on day 8 after *Tsc1* gene deletion. sEPSC: *Tsc1-Cre<sup>-</sup>* n = 16, 3 mice; *Tsc1-Cre<sup>+</sup>* n = 15, 3 mice; non-parametric Mann-Whitney U. sIPSC: *Tsc1-Cre<sup>-</sup>* n = 18, 3 mice; *Tsc1-Cre<sup>+</sup>* n = 19, 3 mice; non-parametric Mann-Whitney U. Error bars indicate SEM.

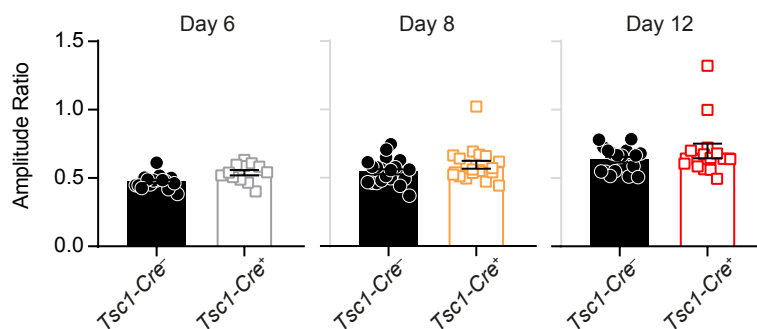

**Supplementary Figure 3. Unaffected E/I amplitude ratio throughout epileptogenesis.** The mEPSC/mIPSC amplitude ratio were recorded from the same cell (Day 6: *Tsc1-Cre<sup>-</sup>* n = 16, 3 mice; *Tsc1-Cre<sup>+</sup>* n = 12, 3 mice; independent T-test), day 8 (*Tsc1-Cre<sup>-</sup>* n = 26, 4 mice; *Tsc1-Cre<sup>+</sup>* n = 30, 6 mice; independent T-test) and day 12 (*Tsc1-Cre<sup>-</sup>* n = 17, 4 mice; *Tsc1-Cre<sup>+</sup>* n = 16, 3 mice; independent T-test). Error bars indicate SEM. v

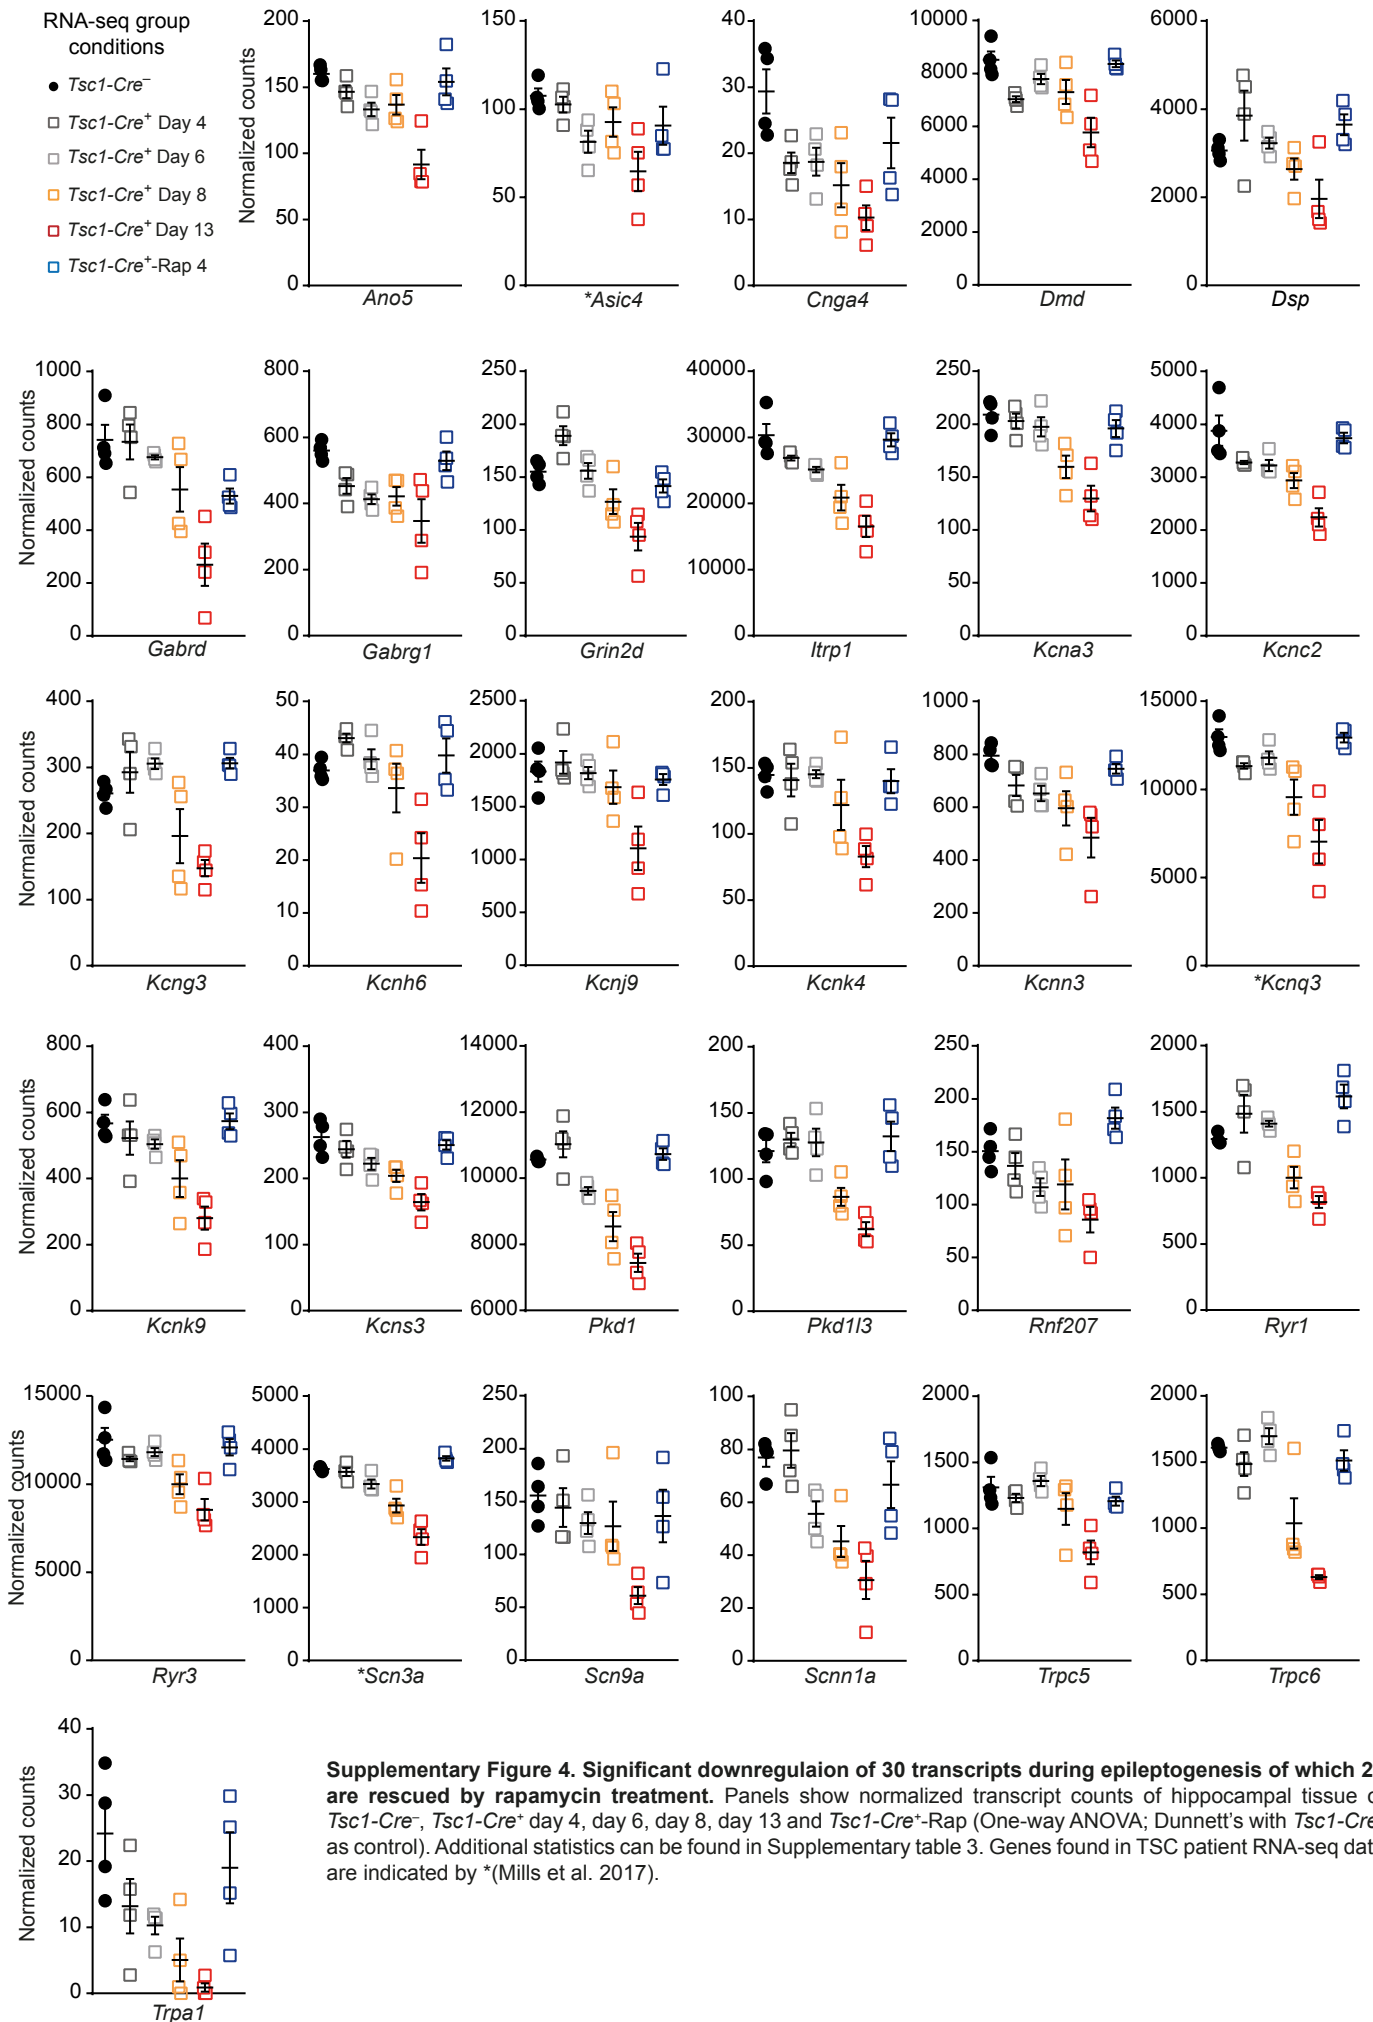

**Supplementary Figure 4. Significant downregulation of 30 transcripts during epileptogenesis of which 29 are rescued by rapamycin treatment.** Panels show normalized transcript counts of hippocampal tissue of *Tsc1-Cre*<sup>-</sup>, *Tsc1-Cre*<sup>+</sup> day 4, day 6, day 8, day 13 and *Tsc1-Cre*<sup>+</sup>-Rap (One-way ANOVA; Dunnett's with *Tsc1-Cre*<sup>-</sup> as control). Additional statistics can be found in Supplementary table 3. Genes found in TSC patient RNA-seq data are indicated by \* (Mills et al. 2017).

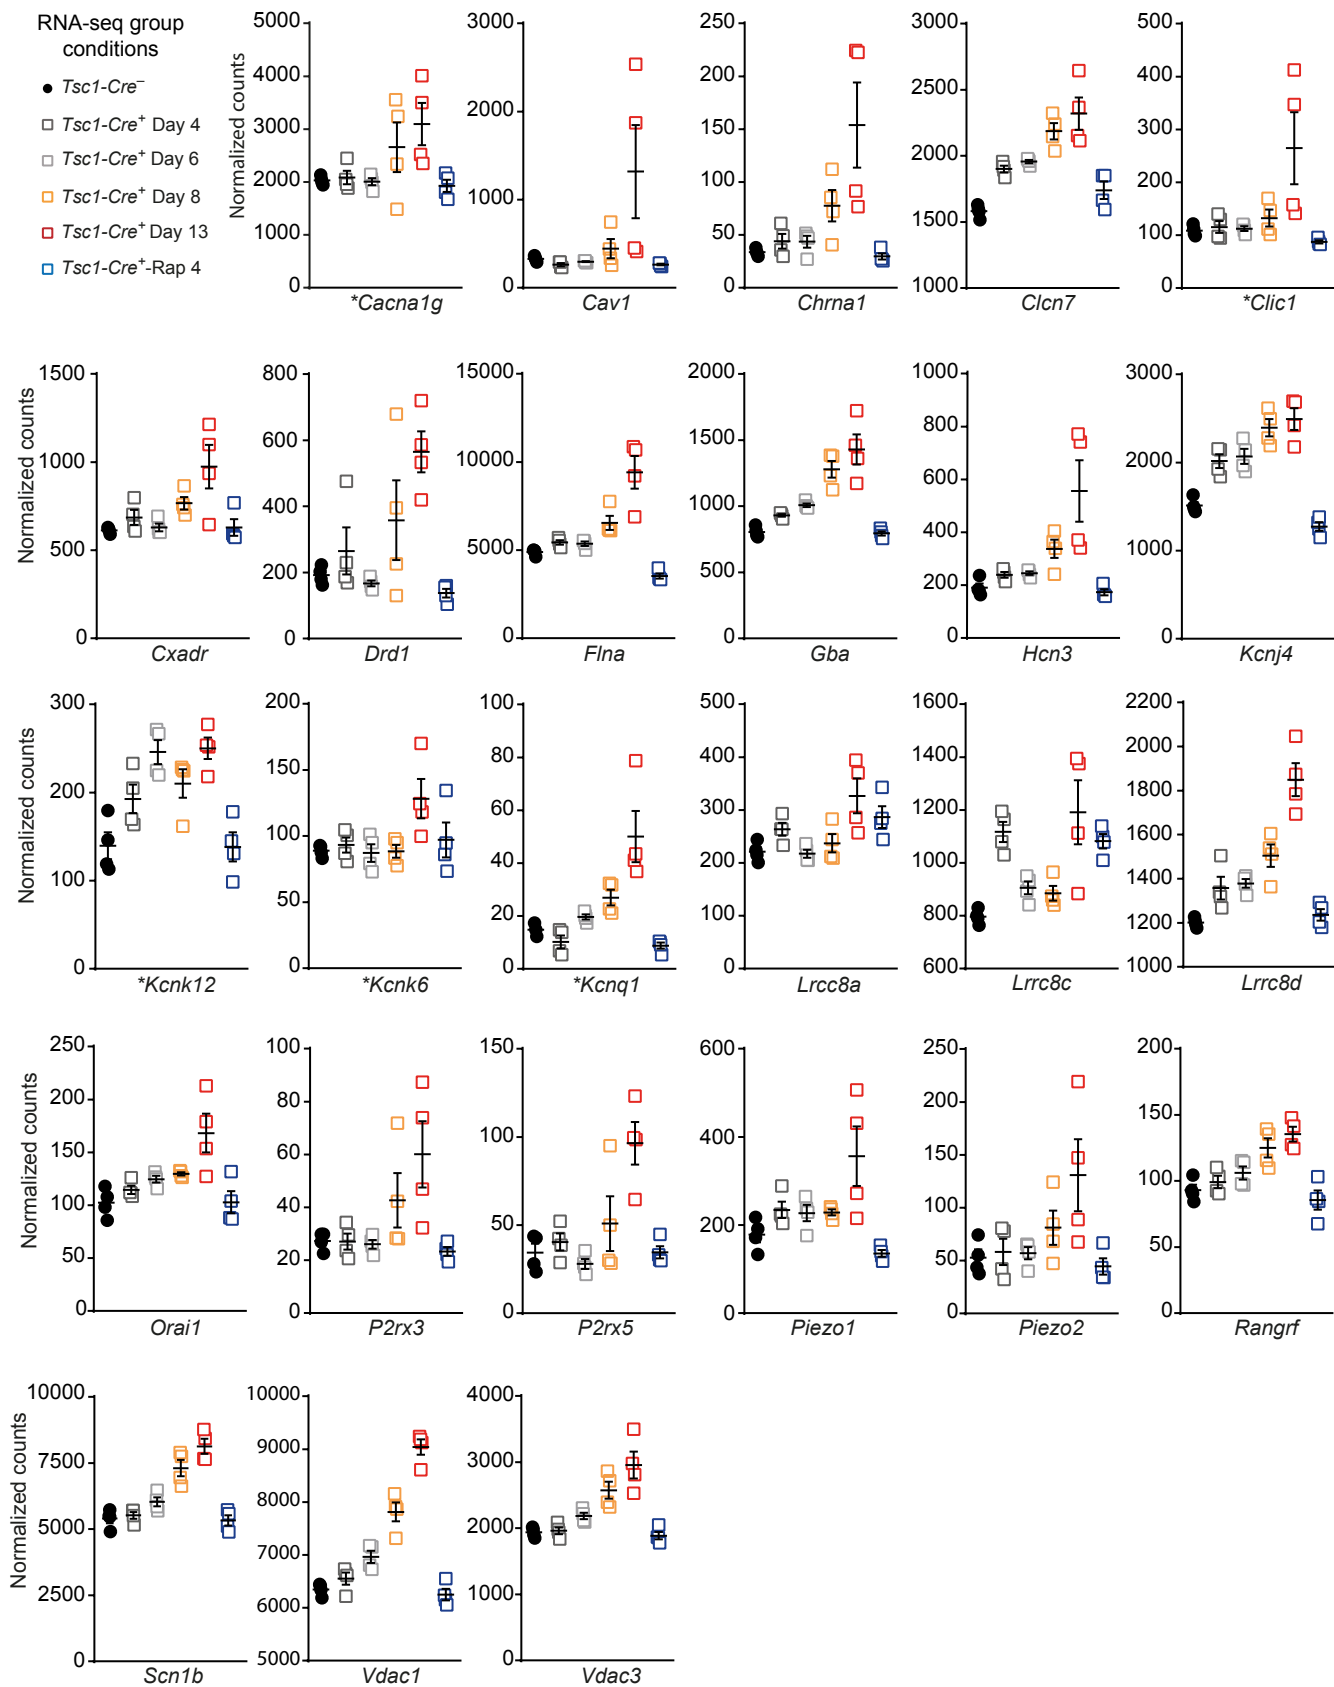

**Supplementary Figure 5. Significant upregulation of 26 transcripts during epileptogenesis of which 25 are rescued by rapamycin treatment.** Panels show normalized transcript counts of hippocampal tissue of *Tsc1-Cre*<sup>-</sup>, *Tsc1-Cre*<sup>+</sup> day 4, day 6, day 8, day 13 and *Tsc1-Cre*<sup>+</sup>-Rap (One-way ANOVA; Dunnett's with *Tsc1-Cre*<sup>-</sup> as control). Additional statistics can be found in Supplementary table 4. Genes found in TSC patient RNA-seq data are indicated by \* (Mills et al. 2017).

**Supplementary Table 1. Statistics of the passive and active membrane properties of *Tsc1-Cre*<sup>-</sup> and *Tsc1-Cre*<sup>+</sup> CA1 pyramidal neurons.**

|                                        | Day 6                        |                              |                                      | Day 8                        |                              |                                        | Day 12                       |                              |                             |
|----------------------------------------|------------------------------|------------------------------|--------------------------------------|------------------------------|------------------------------|----------------------------------------|------------------------------|------------------------------|-----------------------------|
|                                        | <i>Tsc1-Cre</i> <sup>-</sup> | <i>Tsc1-Cre</i> <sup>+</sup> | Statistics                           | <i>Tsc1-Cre</i> <sup>-</sup> | <i>Tsc1-Cre</i> <sup>+</sup> | Statistics                             | <i>Tsc1-Cre</i> <sup>-</sup> | <i>Tsc1-Cre</i> <sup>+</sup> | Statistics                  |
| V <sub>rest</sub> (mV)                 | -48.29 ± 2.73                | -52.06 ± 2.27                | T (28) = 0.97;<br>P = 0.34           | -47.13 ± 2.48                | -51.1 ± 2.045                | T(34) = 1.24;<br>P = 0.22              | -50.06 ± 1.85                | -48.77 ± 1.87                | T(27) = 0.42;<br>P = 0.68   |
| C <sub>m</sub> (pF)                    | 111.37 ± 7.13                | 107.2 ± 4.25                 | T (32) = 0.73;<br>P = 0.47           | 109.5 ± 5.49                 | 110.1 ± 2.96                 | T(42) = 0.11;<br>P = 0.91              | 113.9 ± 7.07                 | 137.4 ± 7.17                 | T(41) = 2.334;<br>P = 0.025 |
| R <sub>m</sub> (MΩ)                    | Med: 172.5                   | Med: 179.5                   | Mann-Whitney<br>U = 118.5; P = 0.38  | 178.3 ± 7.62                 | 189.9 ± 9.64                 | T(42) = 0.95;<br>P = 0.35              | 179.5 ± 7.48                 | 179.4 ± 9.14                 | T(41) = 0.0099;<br>P = 0.99 |
| Rheobase (pA)                          | 91.76 ± 10.01                | 85.88 ± 5.36                 | T(32) = 0.52;<br>P = 0.61            | Med:<br>80                   | Med:<br>80                   | Mann-Whitney<br>U = 205.5;<br>P = 0.38 | 82.33 ± 4.8                  | 97.93 ± 5.28                 | T(40) = 1.62;<br>P = 0.11   |
| Threshold (mV)                         | -46.31 ± 0.44                | -45.96 ± 0.97                | T (32) = 0.41;<br>P = 0.68           | -44.43 ± 0.92                | -45.02 ± 0.80                | T (40) = 0.48;<br>P = 0.63             | -45.21 ± 0.52                | -45.95 ± 0.83                | T (37) = 0.78;<br>P = 0.44  |
| Peak Amplitude 1st AP at rheobase (mV) | Med: 97.97                   | Med: 97.15                   | Mann-Whitney<br>U = 112;<br>P = 0.28 | 98.61 ± 1.70                 | 94.74 ± 1.12                 | T (40) = 0.68;<br>P = 0.51             | 98.13 ± 0.59                 | 99.71 ± 1.11                 | T (37) = 1.3;<br>P = 0.19   |
| 10-90 % rise time (mV/ms)              | 334.59 ± 9.23                | 341.81 ± 7.4                 | T (32) = 0.61;<br>P = 0.54           | 389.8 ± 18.66                | 383.80 ± 13.41               | T (40) = 0.266;<br>P = 0.79            | 334.56 ± 6.8                 | 345.43 ± 9.17                | T (37) = 0.96;<br>P = 0.34  |
| 10-90 % decay time (mV/ms)             | -76.89 ± 1.7                 | -79.57 ± 1.73                | T (32) = 1.09;<br>P = 0.28           | -66.68 ± 2.36                | -70.51 ± 1.82                | T (40) = 1.31;<br>P = 0.197            | -75.702 ± 1.65               | -78.61 ± 1.61                | T (37) = 1.25;<br>P = 0.22  |
| Half-width (ms)                        | 1.08 ± 0.017                 | 1.08 ± 0.013                 | T (32) = 0.12;<br>P = 0.90           | 1.27 ± 0.04                  | 1.243 ± 0.02                 | T (40) = 0.92;<br>P = 0.36             | 1.11 ± 0.023                 | 1.18 ± 0.025                 | T (37) = 2.31;<br>P = 0.026 |
| I <sub>h</sub> (%)                     | 6.68 ± 0.28                  | 5.88 ± 0.4                   | T (32) = 1.58;<br>P = 0.122          | 6.10 ± 0.32                  | 6.29 ± 0.31                  | T (37) = 0.39;<br>P = 0.69             | 6.58 ± 0.34                  | 7.41 ± 0.51                  | T (37) = 1.37;<br>P = 0.18  |
| Latency (ms)                           | 22.61 ± 4.52                 | 33.36 ± 3.21                 | T(32) = 1.97;<br>P = 0.06            | 51.31 ± 3.93                 | 55.86 ± 3.06                 | T(40) = 0.93;<br>P = 0.36              | 30.86 ± 4.05                 | 34.09 ± 3.98                 | T(37) = 0.563;<br>P = 0.58  |

**Supplementary Table 2. Statistics of mEPSC and mIPSC kinetics of CA1 pyramidal neurons.**

|                  |                                 | Day 6                       |                             |                                     | Day 8                       |                             |                            | Day 12                      |                             |                                      |
|------------------|---------------------------------|-----------------------------|-----------------------------|-------------------------------------|-----------------------------|-----------------------------|----------------------------|-----------------------------|-----------------------------|--------------------------------------|
|                  |                                 | <i>Tsc1-Cre<sup>-</sup></i> | <i>Tsc1-Cre<sup>+</sup></i> | Statistics                          | <i>Tsc1-Cre<sup>-</sup></i> | <i>Tsc1-Cre<sup>+</sup></i> | Statistics                 | <i>Tsc1-Cre<sup>-</sup></i> | <i>Tsc1-Cre<sup>+</sup></i> | Statistics                           |
| mEPSC properties | Frequency (Hz)                  | 0.75 ± 0.077                | 0.6 ± 0.096                 | T(39) = 0.21<br>P = .22             | 0.51 ± 0.052                | 0.82 ± 0.14                 | T(54) = 1.89<br>P = 0.06   | 0.56 ± 0.053                | 0.46 ± 0.054                | T(34) = 1.30<br>P = 0.20             |
|                  | Amplitude (pA)                  | -9.65 ± 0.25                | -9.67 ± 0.29                | T(34) = 0.07;<br>P = 0.94           | -11.21 ± 0.27               | -11.06 ± 0.43               | T(36) = 0.29;<br>P = .78   | Med:<br>-9.15               | Med:<br>-8.36               | Mann-Whitney<br>U = 84.0; P = 0.0047 |
|                  | Rise time (10-90% ms)           | Med: 1.46                   | Med: 1.67                   | Mann-Whitney<br>U = 88.0; P = 0.025 | 1.61 ± 0.41                 | 1.79 ± 0.58                 | T(36) = 1.15;<br>P = 0.25  | 1.66 ± 0.09                 | 1.78 ± 0.08                 | T(36) = 1.02;<br>P = 0.32            |
|                  | Decay time constant (10-90% ms) | 6.79 ± 0.34                 | 6.95 ± 1.25                 | T(34) = 0.346;<br>P = 0.74          | 7.51 ± 0.23                 | 7.6 ± 0.34                  | T(36) = 0.20;<br>P = 0.84  | 7.98 ± 0.33                 | 6.71 ± 0.26                 | T(36) = 2.91;<br>P = 0.0061          |
| mIPSC properties | Frequency (Hz)                  | 5.69 ± 0.45                 | 5.88 ± 0.46                 | T(26) = 0.77<br>P = 0.77            | 5.47 ± 0.40                 | 4.82 ± 0.29                 | T(44) = 1.35<br>P = 0.18   | 4.52 ± 0.34                 | 2.31 ± 0.31                 | T(29) = 4.72<br>P = 0.0001           |
|                  | Amplitude (pA)                  | 20.42 ± 0.58                | 19.06 ± 0.68                | T(25) = 1.53;<br>P = 0.14           | 19.45 ± 0.58                | 18.57 ± 0.58                | T(33) = 1.06;<br>P = 0.29  | 15.27 ± 0.39                | 13.16 ± 0.38                | T(31) = 3.82;<br>P = 0.0006          |
|                  | Rise time (10-90% ms)           | 0.55 ± 0.024                | 0.61 ± 0.028                | T(25) = 1.78;<br>P = 0.09           | 0.58 ± 0.03                 | 0.66 ± 0.03                 | T(33) = 1.79;<br>P = 0.082 | 0.53 ± 0.02                 | 0.75 ± 0.04                 | T(31) = 4.98;<br>P = 0.0001          |
|                  | Decay time constant (10-90% ms) | 11.85 ± 1.25                | 12.91 ± 1.31                | T(25) = 0.57;<br>P = 0.57           | 14.08 ± 1.171               | 16.39 ± 1.3                 | T(33) = 1.29;<br>P = 0.2   | 13.57 ± 1.23                | 13.15 ± 1.28                | T(31) = 0.23;<br>P = 0.81            |

**Supplementary Table 3. Detailed statistics of downregulated DE ‘action potential’ genes overtime.**

|    | GeneID                 | Gene                      | One-way ANOVA<br>(Dunnett's post hoc) | <i>Tsc1-Cre<sup>-</sup></i> |         | <i>Tsc1-Cre<sup>+</sup>-Day 4</i> |        |       | <i>Tsc1-Cre<sup>+</sup>-Day 6</i> |        |       | <i>Tsc1-Cre<sup>+</sup>-Day 8</i> |         |        | <i>Tsc1-Cre<sup>+</sup>-Day 13</i> |         |        | <i>Tsc1-Cre<sup>+</sup>-Rap 4</i> |         |      |
|----|------------------------|---------------------------|---------------------------------------|-----------------------------|---------|-----------------------------------|--------|-------|-----------------------------------|--------|-------|-----------------------------------|---------|--------|------------------------------------|---------|--------|-----------------------------------|---------|------|
|    |                        |                           |                                       | Mean                        | SEM     | Mean                              | SEM    | Sig   | Mean                              | SEM    | Sig   | Mean                              | SEM     | Sig    | Mean                               | SEM     | Sig    | Mean                              | SEM     | Sig  |
| 1  | ENSMUSG<br>0000055489  | <i>Ano5</i>               | F(5, 18) = 10.65<br>P < 0.0001        | 160.10                      | 2.98    | 146.62                            | 4.76   | 0.59  | 133.26                            | 5.12   | 0.07  | 136.86                            | 7.33    | 0.14   | 91.61                              | 11.07   | 0.0001 | 154.04                            | 10.14   | 0.96 |
| 2  | ENSMUSG<br>00000033007 | * <i>Asic4</i>            | F(5, 18) = 3.68<br>P = 0.0180         | 107.67                      | 4.09    | 102.61                            | 4.40   | 0.98  | 81.50                             | 6.25   | 0.12  | 92.63                             | 8.37    | 0.56   | 64.68                              | 11.18   | 0.0059 | 90.64                             | 10.86   | 0.45 |
| 3  | ENSMUSG<br>00000030897 | <i>Cnga4</i>              | F(5, 18) = 5.21<br>P = 0.0039         | 29.38                       | 3.33    | 18.56                             | 1.55   | 0.054 | 18.74                             | 2.11   | 0.059 | 15.18                             | 3.35    | 0.0091 | 10.28                              | 1.87    | 0.0006 | 21.58                             | 3.82    | 0.22 |
| 4  | ENSMUSG<br>00000045103 | <i>Dmd</i>                | F(5, 18) = 8.99<br>P = 0.0002         | 8514.04                     | 321.34  | 7027.31                           | 195.35 | 0.02  | 7792.36                           | 195.68 | 0.44  | 7295.8                            | 453.93  | 0.07   | 5763.88                            | 556.28  | 0.0001 | 8362.87                           | 125.34  | 0.99 |
| 5  | ENSMUSG<br>00000054889 | <i>Dsp</i>                | F(5, 18) = 4.41<br>P = 0.008          | 3063.25                     | 101.93  | 3855.32                           | 564.98 | 0.33  | 3227.30                           | 123.76 | 0.99  | 2640.59                           | 242.46  | 0.82   | 1963.39                            | 434.10  | 0.1    | 3646.74                           | 236.32  | 0.6  |
| 6  | ENSMUSG<br>00000029054 | <i>Gabrd</i><br>(GABAδ)   | F(5, 18) = 8.63<br>P = 0.0003         | 741.48                      | 57.51   | 733.67                            | 66.17  | 0.99  | 675.78                            | 7.62   | 0.90  | 554.32                            | 84.23   | 0.15   | 269.23                             | 80.07   | 0.0002 | 529.08                            | 28.23   | 0.08 |
| 7  | ENSMUSG<br>00000001260 | <i>Gabrg1</i><br>(GABAγ1) | F(5, 18) = 5.42<br>P = 0.003          | 559.91                      | 13.86   | 453.22                            | 23.78  | 0.13  | 413.22                            | 14.84  | 0.027 | 421.94                            | 27.96   | 0.039  | 347.15                             | 65.67   | 0.0014 | 529.34                            | 28.18   | 0.94 |
| 8  | ENSMUSG<br>00000002771 | <i>Grin2d</i><br>(NMDA2D) | F(5, 18) = 12.17<br>P < 0.0001        | 155.13                      | 5.17    | 189.14                            | 9.00   | 0.06  | 155.92                            | 7.43   | 0.99  | 126.71                            | 11.62   | 0.15   | 93.69                              | 13.04   | 0.0008 | 141.65                            | 6.22    | 0.75 |
| 9  | ENSMUSG<br>00000030102 | <i>Itpr1</i>              | F(5, 18) = 16.19<br>P < 0.0001        | 30329.09                    | 1696.68 | 26877.54                          | 374.44 | 0.26  | 25134.55                          | 419.17 | 0.04  | 20907.05                          | 1935.79 | 0.0004 | 16556.27                           | 1593.88 | 0.0001 | 29643.23                          | 1002.85 | 0.99 |
| 10 | ENSMUSG<br>00000047959 | <i>Kcna3</i><br>(Kv1.3)   | F(5, 18) = 11.38<br>P < 0.0001        | 208.86                      | 7.28    | 203.02                            | 6.97   | 0.98  | 197.49                            | 8.96   | 0.84  | 159.65                            | 10.73   | 0.0006 | 129.67                             | 12.12   | 0.0001 | 195.86                            | 8.11    | 0.77 |
| 11 | ENSMUSG<br>00000035681 | <i>Kcnc2</i><br>(Kv3.2)   | F(5, 18) = 13.63<br>P < 0.0001        | 3879.38                     | 287.63  | 3276.40                           | 31.48  | 0.061 | 3222.38                           | 105.52 | 0.038 | 2935.95                           | 143.54  | 0.002  | 2239.89                            | 169.99  | 0.0001 | 3739.73                           | 98.43   | 0.96 |
| 12 | ENSMUSG<br>00000045053 | <i>Kcng3</i><br>(Kv6.3)   | F(5, 18) = 8.62<br>P = 0.0003         | 260.73                      | 8.51    | 292.83                            | 31.10  | 0.76  | 305.60                            | 8.17   | 0.49  | 196.21                            | 41.01   | 0.19   | 147.60                             | 12.38   | 0.009  | 306.39                            | 8.03    | 0.48 |
| 13 | ENSMUSG<br>00000001901 | <i>Kcnh6</i><br>(Kv11.2)  | F(5, 18) = 6.63<br>P = 0.001          | 36.98                       | 0.94    | 43.09                             | 0.84   | 0.51  | 39.09                             | 1.89   | 0.98  | 33.62                             | 4.58    | 0.9    | 20.38                              | 4.68    | 0.006  | 39.77                             | 3.23    | 0.95 |
| 14 | ENSMUSG<br>00000038026 | <i>Kcnj9</i><br>(Kir3.3)  | F(5, 18) = 5.56<br>P = 0.0029         | 1831.54                     | 96.41   | 1917.66                           | 107.19 | 0.98  | 1817.90                           | 57.07  | 0.99  | 1685.28                           | 157.04  | 0.87   | 1105.95                            | 205.97  | 0.002  | 1756.87                           | 50.24   | 0.99 |
| 15 | ENSMUSG<br>00000024957 | <i>Kcnk4</i><br>(TRAAK)   | F(5, 18) = 5.10<br>P = 0.0044         | 144.77                      | 4.81    | 140.84                            | 12.32  | 0.99  | 145.24                            | 3.08   | 0.99  | 121.99                            | 19.00   | 0.44   | 82.91                              | 8.06    | 0.003  | 139.97                            | 9.09    | 0.99 |
| 16 | ENSMUSG<br>00000036760 | <i>Kcnk9</i><br>(TASK3)   | F(5, 18) = 9.37<br>P = 0.0002         | 567.46                      | 25.65   | 522.79                            | 50.46  | 0.86  | 504.42                            | 14.10  | 0.64  | 400.07                            | 55.61   | 0.021  | 280.46                             | 35.23   | 0.0002 | 573.57                            | 23.93   | 0.99 |
| 17 | ENSMUSG<br>00000000794 | <i>Kcnn3</i><br>(SK3)     | F(5, 18) = 5.60<br>P = 0.002          | 794.42                      | 21.07   | 682.28                            | 39.94  | 0.33  | 651.80                            | 28.90  | 0.15  | 595.73                            | 64.41   | 0.029  | 484.91                             | 75.16   | 0.0008 | 745.06                            | 17.77   | 0.91 |
| 18 | ENSMUSG<br>00000056258 | * <i>Kcnq3</i><br>(Kv7.3) | F(5, 18) = 10.70<br>P < 0.0001        | 12972.57                    | 431.86  | 11324.96                          | 152.11 | 0.35  | 11792.91                          | 358.06 | 0.64  | 9553.82                           | 997.13  | 0.017  | 7042.54                            | 1234.75 | 0.0001 | 12938.20                          | 269.68  | 0.99 |
| 19 | ENSMUSG<br>00000043673 | <i>Kcns3</i><br>(Kv9.3)   | F(5, 18) = 11.33<br>P < 0.0001        | 262.60                      | 13.25   | 244.32                            | 12.42  | 0.64  | 222.33                            | 9.01   | 0.064 | 204.20                            | 9.23    | 0.005  | 164.23                             | 12.24   | 0.0001 | 250.82                            | 7.20    | 0.89 |
| 20 | ENSMUSG<br>00000032855 | <i>Pkd1</i>               | F(5, 18) = 25.54<br>P < 0.0001        | 10564.87                    | 36.74   | 11028.39                          | 393.84 | 0.66  | 9615.08                           | 115.35 | 0.1   | 8538.27                           | 439.17  | 0.0003 | 7441.26                            | 278.32  | 0.0001 | 10728.32                          | 174.77  | 0.99 |
| 21 | ENSMUSG<br>00000048827 | <i>Pkd1l3</i>             | F(5, 18) = 12.31<br>P < 0.0001        | 121.20                      | 8.46    | 129.85                            | 5.22   | 0.91  | 127.70                            | 10.42  | 0.97  | 86.56                             | 6.87    | 0.03   | 62.05                              | 5.31    | 0.0004 | 132.25                            | 11.15   | 0.86 |

|    |                        |                                                 |                                                 |                |              |                |              |             |                |              |             |                |               |               |                |               |               |                |              |             |
|----|------------------------|-------------------------------------------------|-------------------------------------------------|----------------|--------------|----------------|--------------|-------------|----------------|--------------|-------------|----------------|---------------|---------------|----------------|---------------|---------------|----------------|--------------|-------------|
| 22 | ENSMUSG<br>00000058498 | <i>*Rnf207</i>                                  | F(5, 18) = 5.92<br>P = 0.002                    | 150.62         | 8.58         | 136.75         | 12.07        | 0.92        | 116.48         | 23.65        | 0.29        | 119.09         | 23.65         | 0.36          | 85.71          | 12.11         | 0.013         | 181.85         | 9.94         | 0.37        |
| 23 | ENSMUSG<br>00000030592 | <i>Ryr1</i>                                     | F(5, 18) = 14.70<br>P < 0.0001                  | 1293.03        | 19.72        | 1485.25        | 142.57       | 0.32        | 1409.94        | 21.38        | 0.74        | 1001.65        | 81.12         | 0.069         | 818.23         | 44.66         | 0.002         | 1616.77        | 89.63        | 0.039       |
| 24 | ENSMUSG<br>00000057378 | <i>Ryr3</i>                                     | F(5, 18) = 9.72<br>P = 0.0001                   | 12517.11       | 667.81       | 11432.48       | 121.14       | 0.39        | 11816.40       | 225.41       | 0.75        | 9993.19        | 562.78        | 0.007         | 8552.84        | 600.93        | 0.0001        | 12092.26       | 456.70       | 0.95        |
| 25 | ENSMUSG<br>00000057182 | <i>*Scn3a</i><br>(Nav1.3 $\alpha$ -<br>subunit) | <b>F(5, 18) = 33.98</b><br><b>P &lt; 0.0001</b> | <b>3620.85</b> | <b>19.05</b> | <b>3567.24</b> | <b>75.04</b> | <b>0.99</b> | <b>3339.37</b> | <b>85.39</b> | <b>0.17</b> | <b>2931.03</b> | <b>130.10</b> | <b>0.0003</b> | <b>2335.78</b> | <b>146.38</b> | <b>0.0001</b> | <b>3823.54</b> | <b>41.15</b> | <b>0.43</b> |
| 26 | ENSMUSG<br>00000075316 | <i>Scn9a</i>                                    | F(5, 18) = 3.64<br>P = 0.0189                   | 155.65         | 12.64        | 144.30         | 18.25        | 0.98        | 129.71         | 10.29        | 0.74        | 126.76         | 23.31         | 0.66          | 61.13          | 8.09          | 0.005         | 136.37         | 24.92        | 0.89        |
| 27 | ENSMUSG<br>00000030340 | <i>Scnn1a</i>                                   | F(5, 18) = 9.04<br>P = 0.0002                   | 76.91          | 3.43         | 79.58          | 6.54         | 0.99        | 55.58          | 4.75         | 0.10        | 45.16          | 5.82          | 0.0097        | 30.61          | 7.19          | 0.0003        | 66.64          | 8.82         | 0.67        |
| 28 | ENSMUSG<br>00000041710 | <i>Trpc5</i>                                    | F(5, 18) = 6.88<br>P = 0.0009                   | 1311.73        | 78.23        | 1231.29        | 30.47        | 0.89        | 1359.62        | 38.23        | 0.98        | 1147.94        | 120.37        | 0.39          | 819.69         | 88.93         | 0.0007        | 1207.34        | 33.77        | 0.76        |
| 29 | ENSMUSG<br>00000031997 | <i>Trpc6</i>                                    | F(5, 18) = 18.71<br>P < 0.0001                  | 1609.29        | 12.99        | 1485.21        | 89.65        | 0.82        | 1695.72        | 60.83        | 0.94        | 1036.36        | 189.68        | 0.002         | 630.99         | 13.84         | 0.0001        | 1512.63        | 77.88        | 0.92        |
| 30 | ENSMUSG<br>00000032769 | <i>Trpa1</i>                                    | F(5, 18) = 5.59<br>P = 0.0028                   | 24.21          | 4.67         | 13.20          | 4.10         | 0.16        | 10.27          | 1.34         | 0.057       | 5.06           | 3.24          | 0.0069        | 0.89           | 0.65          | 0.0012        | 18.99          | 5.37         | 0.76        |

Supplementary Table 4. Detailed statistics of upregulated DE ‘action potential’ genes overtime.

|    | GeneID                 | Gene                                   | One-way ANOVA<br>(Dunnet's post hoc)            | <i>Tsc1-Cre<sup>-</sup></i> |              | <i>Tsc1-Cre<sup>+</sup>-Day 4</i> |               |             | <i>Tsc1-Cre<sup>+</sup>-Day 6</i> |                |               | <i>Tsc1-Cre<sup>+</sup>-Day 8</i> |               |              | <i>Tsc1-Cre<sup>+</sup>-Day 13</i> |               |               | <i>Tsc1-Cre<sup>+</sup>-Rap 4</i> |               |             |
|----|------------------------|----------------------------------------|-------------------------------------------------|-----------------------------|--------------|-----------------------------------|---------------|-------------|-----------------------------------|----------------|---------------|-----------------------------------|---------------|--------------|------------------------------------|---------------|---------------|-----------------------------------|---------------|-------------|
|    |                        |                                        |                                                 | Mean                        | SEM          | Mean                              | SEM           | Sig         | Mean                              | SEM            | Sig           | Mean                              | SEM           | Sig          | Mean                               | SEM           | Sig           | Mean                              | SEM           | Sig         |
| 1  | ENSMUSG<br>00000020866 | <i>*Cacna1g</i>                        | F(5, 18) = 3.21<br>P = 0.0302                   | 2032.02                     | 40.48        | 2085.58                           | 124.97        | 0.99        | 2006.47                           | 68.51          | 0.99          | 2657.52                           | 467.56        | 0.34         | 3095.98                            | 397.22        | 0.04          | 1930.36                           | 115.20        | 0.99        |
| 2  | ENSMUSG<br>00000007655 | <i>Cav1</i>                            | F(5, 18) = 22.63<br>P = 0.02                    | 330.3                       | 15.64        | 263.4                             | 17.38         | 0.99        | 287.5                             | 6.22           | 0.99          | 444.7                             | 107.8         | 0.99         | 1319                               | 528.9         | 0.022         | 264                               | 9.61          | 0.99        |
| 3  | ENSMUSG<br>00000027107 | <i>Chrna1</i>                          | F(5, 18) = 6.93<br>P = 0.0009                   | 33.61                       | 1.68         | 43.98                             | 7.02          | 0.99        | 43.65                             | 5.56           | 0.99          | 77.71                             | 14.86         | 0.32         | 153.87                             | 40.30         | 0.0008        | 29.66                             | 2.89          | 0.99        |
| 4  | ENSMUSG<br>00000036636 | <i>Cln7</i>                            | F(5, 18) = 18.47<br>P < 0.0001                  | 1582.31                     | 23.93        | 1900.81                           | 25.10         | 0.009       | 1958.03                           | 12.02          | 0.0025        | 2187.02                           | 61.79         | 0.0001       | 2320.47                            | 122.01        | 0.0001        | 1740.86                           | 65.59         | 0.31        |
| 5  | ENSMUSG<br>00000007041 | <i>*Clic1</i>                          | F(5, 18) = 4.89<br>P = 0.0053                   | 108.76                      | 5.01         | 115.62                            | 11.44         | 0.99        | 112.41                            | 4.46           | 0.99          | 132.55                            | 15.82         | 0.96         | 264.65                             | 67.93         | 0.006         | 87.56                             | 3.04          | 0.98        |
| 6  | ENSMUSG<br>00000022865 | <i>Cxadr</i>                           | F(5, 18) = 5.46<br>P = 0.0031                   | 613.55                      | 8.41         | 686.24                            | 42.45         | 0.85        | 629.46                            | 21.75          | 0.99          | 766.95                            | 35.3          | 0.27         | 973.92                             | 123.27        | 0.0019        | 629.2                             | 46.95         | 0.99        |
| 7  | ENSMUSG<br>00000021478 | <i>Drd1</i>                            | F(5, 18) = 6.45<br>P = 0.0013                   | 192.06                      | 13.44        | 265.31                            | 71.29         | 0.87        | 166.99                            | 8.82           | 0.99          | 358.08                            | 120.38        | 0.26         | 565.06                             | 62.32         | 0.002         | 137.64                            | 12.91         | 0.95        |
| 8  | ENSMUSG<br>00000031328 | <i>Flna</i>                            | <b>F5, 18) = 22.34</b><br><b>P &lt; 0.0001</b>  | <b>4889.15</b>              | <b>88.28</b> | <b>5441.7</b>                     | <b>121.22</b> | <b>0.82</b> | <b>5361.06</b>                    | <b>124.155</b> | <b>0.89</b>   | <b>6547.12</b>                    | <b>406.04</b> | <b>0.048</b> | <b>9417.26</b>                     | <b>918.61</b> | <b>0.0001</b> | <b>3532.96</b>                    | <b>150.75</b> | <b>0.13</b> |
| 9  | ENSMUSG<br>00000028048 | <i>Gba</i>                             | F(5, 18) = 22.48<br>P < 0.0001                  | 806.10                      | 20.25        | 930.54                            | 9.75          | 0.38        | 1008.1                            | 13.6           | 0.06          | 1280.5                            | 62.72         | 0.0001       | 1429.8                             | 114.61        | 0.0001        | 794.27                            | 16.68         | 0.99        |
| 10 | ENSMUSG<br>00000028051 | <i>Hcn3</i>                            | F(5, 18) = 8.02<br>P = 0.0004                   | 190.42                      | 15.97        | 239.16                            | 10.55         | 0.93        | 245.33                            | 6.78           | 0.89          | 337.75                            | 34.60         | 0.18         | 556.26                             | 115.90        | 0.0003        | 173.14                            | 11.16         | 0.99        |
| 11 | ENSMUSG<br>00000044216 | <i>Kcnj4</i><br>(Kir2.3)               | F(5, 18) = 32.54<br>P < 0.0001                  | 1511.66                     | 42.21        | 2016.42                           | 79.21         | 0.0022      | 2070.06                           | 85.74          | 0.0009        | 2395.53                           | 97.97         | 0.0001       | 2494.50                            | 123.75        | 0.0001        | 1274.66                           | 50.12         | 0.21        |
| 12 | ENSMUSG<br>00000050138 | <b>*Kcnk12</b><br><b>(2PK channel)</b> | <b>F(5, 18) = 10.74</b><br><b>P &lt; 0.0001</b> | <b>139.50</b>               | <b>15.23</b> | <b>192.84</b>                     | <b>16.21</b>  | <b>0.08</b> | <b>245.89</b>                     | <b>13.53</b>   | <b>0.0004</b> | <b>210.17</b>                     | <b>16.17</b>  | <b>0.016</b> | <b>250.23</b>                      | <b>12.13</b>  | <b>0.0003</b> | <b>138.26</b>                     | <b>16.51</b>  | <b>0.99</b> |
| 13 | ENSMUSG<br>00000046410 | <i>*Kcnk6</i><br>(TWIK2,<br>TOSS)      | F(5, 18) = 2.94<br>P = 0.0409                   | 88.98                       | 2.23         | 93.27                             | 5.64          | 0.99        | 87.18                             | 6.60           | 0.99          | 88.54                             | 4.81          | 0.99         | 128.26                             | 14.89         | 0.02          | 97.15                             | 13.16         | 0.95        |
| 14 | ENSMUSG<br>00000009545 | <i>*Kcnq1</i><br>(Kv7.1)               | F(5, 18) = 12.77<br>P < 0.0001                  | 14.87                       | 1.05         | 10.24                             | 2.40          | 0.9         | 19.67                             | 0.94           | 0.89          | 26.98                             | 2.95          | 0.21         | 50.04                              | 9.65          | 0.0001        | 8.80                              | 1.16          | 0.77        |
| 15 | ENSMUSG<br>00000007476 | <i>Lrrc8a</i>                          | F(5, 18) = 5.18<br>P = 0.0041                   | 221.02                      | 9.07         | 263.56                            | 12.18         | 0.38        | 217.43                            | 7.50           | 0.99          | 237.11                            | 17.28         | 0.96         | 326.72                             | 32.88         | 0.0036        | 286.55                            | 20.55         | 0.086       |
| 16 | ENSMUSG<br>00000054720 | <i>Lrrc8c</i>                          | F(5, 18) = 5.95<br>P = 0.002                    | 796.38                      | 13.76        | 1117.23                           | 37.96         | 0.002       | 905.18                            | 24.28          | 0.51          | 884.602                           | 27.77         | 0.69         | 1191.66                            | 120.95        | 0.0004        | 1081.92                           | 26.9          | 0.007       |
| 17 | ENSMUSG<br>00000046079 | <i>Lrrc8d</i><br>(VRACs)               | F(5, 18) = 27.77<br>P < 0.0001                  | 1201.48                     | 10.76        | 1357.44                           | 51.09         | 0.09        | 1378.90                           | 19.79          | 0.046         | 1505.41                           | 50.89         | 0.0007       | 1849.74                            | 75.18         | 0.0001        | 1236.02                           | 26.52         | 0.97        |
| 18 | ENSMUSG<br>00000049686 | <i>Orai1</i>                           | F(5, 18) = 6.93<br>P = 0.0009                   | 102.48                      | 6.81         | 114.49                            | 3.96          | 0.90        | 124.69                            | 3.31           | 0.43          | 129.64                            | 1.49          | 0.24         | 168.28                             | 18.28         | 0.0005        | 102.84                            | 10.43         | 0.99        |
| 19 | ENSMUSG<br>00000027071 | <i>P2rx3</i>                           | F(5, 18) = 4.40<br>P = 0.0086                   | 27.28                       | 1.73         | 27.04                             | 3.06          | 0.99        | 26.04                             | 1.65           | 0.99          | 42.66                             | 10.26         | 0.39         | 60.09                              | 12.51         | 0.013         | 23.33                             | 1.63          | 0.99        |
| 20 | ENSMUSG<br>00000005950 | <i>P2rx5</i>                           | F(5, 18) = 8.37<br>P = 0.0003                   | 34.48                       | 5.09         | 40.48                             | 4.85          | 0.98        | 28.00                             | 2.80           | 0.98          | 50.90                             | 15.51         | 0.55         | 96.48                              | 12.06         | 0.0004        | 34.56                             | 3.49          | 0.99        |
| 21 | ENSMUSG<br>00000014444 | <i>Piezo1</i>                          | F(5, 18) = 5.79<br>P = 0.0023                   | 178.45                      | 17.64        | 234.35                            | 18.60         | 0.58        | 227.05                            | 18.53          | 0.69          | 228.79                            | 6.67          | 0.67         | 356.22                             | 67.72         | 0.003         | 135.59                            | 7.72          | 0.78        |



|    |                        |                                                                        |                                                 |                |               |                |               |             |                |               |             |                |               |               |                |               |               |                |               |             |
|----|------------------------|------------------------------------------------------------------------|-------------------------------------------------|----------------|---------------|----------------|---------------|-------------|----------------|---------------|-------------|----------------|---------------|---------------|----------------|---------------|---------------|----------------|---------------|-------------|
| 22 | ENSMUSG<br>00000041482 | <i>Piezo2</i>                                                          | F(5, 18) = 3.52<br>P = 0.0216                   | 52.75          | 8.04          | 58.30          | 12.30         | 0.99        | 57.11          | 5.83          | 0.99        | 81.16          | 16.30         | 0.65          | 130.81         | 33.98         | 0.01          | 44.57          | 7.67          | 0.99        |
| 23 | ENSMUSG<br>00000032892 | <i>Rangrf</i>                                                          | F5, 18) = 11.04<br>P < 0.0001                   | 93.01          | 4.19          | 99.26          | 4.66          | 0.90        | 106.11         | 5.0           | 0.38        | 125.07         | 7.27          | 0.0044        | 135.36         | 7.26          | 0.0003        | 85.48          | 7.26          | 0.82        |
| 24 | ENSMUSG<br>00000019194 | <b><i>Scn1b</i></b><br><b>(Nav1.1 <math>\beta</math>-<br/>subunit)</b> | <b>F(5, 18) = 28.35</b><br><b>P &lt; 0.0001</b> | <b>5403.76</b> | <b>174.34</b> | <b>5522.19</b> | <b>128.05</b> | <b>0.99</b> | <b>6030.54</b> | <b>168.23</b> | <b>0.19</b> | <b>7310.30</b> | <b>306.87</b> | <b>0.0001</b> | <b>8132.58</b> | <b>281.72</b> | <b>0.0001</b> | <b>5332.62</b> | <b>197.50</b> | <b>0.99</b> |
| 25 | ENSMUSG<br>00000020402 | <i>Vdac1</i>                                                           | F(5, 18) = 74.93<br>P < 0.0001                  | 6347.18        | 57.68         | 6553.16        | 113.92        | 0.67        | 6965.88        | 115.99        | 0.01        | 7814.14        | 177.58        | 0.0001        | 9039.30        | 145.04        | 0.0001        | 6249.80        | 106.90        | 0.97        |
| 26 | ENSMUSG<br>00000008892 | <i>Vdac3</i>                                                           | F(5, 18) = 16.28<br>P < 0.0001                  | 1938.86        | 37.80         | 1962.13        | 51.54         | 0.99        | 2187.14        | 48.93         | 0.35        | 2575.43        | 128.77        | 0.002         | 2954.60        | 203.07        | 0.0001        | 1888.15        | 57.47         | 0.99        |
